# Supplementary material
Source: publisher figshare collection journal article supplement (https://sage.figshare.com/ndownloader/files/14375774)
Supplement: Supplementary file 1 [file 14375774]

## Supplementary Material

### *S1. Zoning*

The **modifiable areal unit problem** is typical for urban studies using spatial data and may affect the generalizability of findings (Hu & Wang, 2016). In this study, we adopted a uniform grid system (Zhou & Long, 2016), rather than administrative units, **for** the following reasons: (1) the consistent shape and size of grid cells **render** them more statistically comparable, especially for the diversity measures; (2) grid cells do not change over time **and enable** statistical time series, **which is** especially **useful for analyzing** rapidly developing areas **such as** China; **and** (3) grid data can, if needed, be further aggregated into administrative units. **The** Klasovsky 1940 Albers **projection** was selected as the coordinate system for the **grids** to ensure that each grid has the same area.

Table S1. Descriptive statistics for the candidate explanatory variables for modeling urban vibrancy

| Candidate Explanatory Variables        | Minimum | Mean  | Maximum | Std. Deviation |
|----------------------------------------|---------|-------|---------|----------------|
| Building density                       | 0.00    | 0.04  | 0.66    | 0.06           |
| Density of urban functions             | 0.00    | 0.02  | 0.13    | 0.02           |
| Mean building height                   | 2.00    | 10.59 | 44.00   | 5.72           |
| Diversity of urban functions           | 0.56    | 1.87  | 2.32    | 0.29           |
| Diversity of building height           | 957     | 10693 | 69984   | 8325           |
| Diversity of building age              | 0.24    | 5.29  | 33.15   | 4.48           |
| Diversity of house prices              | 0.11    | 5.03  | 37.52   | 3.85           |
| Mean house price                       | 11530   | 46371 | 158006  | 19070          |
| Mean building age                      | 2.00    | 27.97 | 131.00  | 19.44          |
| Density of road junctions              | 3.00    | 49.69 | 187.00  | 29.85          |
| Accessibility by public transportation | 0.00    | 23.59 | 112.00  | 19.22          |
| Distance to city center                | 306     | 7708  | 18390   | 3963           |

\* N=741 (grid cells with less than 5 data records were excluded)

Table S2. A survey of the results of quantitative studies on urban vibrancy and UBEs

| UBE indicators                   | De Nadai <i>et al.</i> (2016)       | Yue <i>et al.</i> (2017) | Long and Huang (2017)                  |
|----------------------------------|-------------------------------------|--------------------------|----------------------------------------|
| POI density                      | Significant                         | Not significant          | 0.052*                                 |
| POI diversity                    | Not significant                     | Significant <sup>1</sup> | 0.110*                                 |
| Intersection density             | 0.191*                              | N/A                      | 0.266*                                 |
| Height of buildings              | 0.185*                              |                          | N/A                                    |
| Aging buildings                  | Not significant                     |                          | N/A                                    |
| Locational factor                | Proximity to highway                | N/A                      | Access to transit                      |
| Other significant UBE indicators | 3 <sup>rd</sup> places <sup>3</sup> | N/A                      | Amenities                              |
| <b>Other significant factors</b> | Employment density                  | Demographics             | City-level attributes                  |
| <b>Study area</b>                | Italian Cities                      | Chinese cities           |                                        |
| <b>Measure of vibrancy</b>       | Mobile phone data                   | Mobile phone data        | Economic vitality:<br>Dianping reviews |

\*  $p < 0.005$

<sup>1</sup> Yue *et al.* (2017) included unstandardized coefficients in the manuscript; thus, the actual number is not listed here.
